# Supplementary material for: Diffusion Tensor Imaging White Matter Endophenotypes in Patients With Schizophrenia or Psychotic Bipolar Disorder and Their Relatives
Source: Atypon-hosted journal article supplement (doi:10.1176/appi.ajp.2013.12111448), 2013-06-17
Supplement: 886_ds001.pdf [file 886_ds001.pdf]

Online supplement data :

| ROI     | ROI name                                            | MNI coord (mm) | HC>SZ | HC>S ZR | HC>P BP | HC>P BPR | Heritability h <sup>2</sup> | Heritability p-value |
|---------|-----------------------------------------------------|----------------|-------|---------|---------|----------|-----------------------------|----------------------|
| MCP     | Middle cerebellar peduncle                          | 0 -41 -44      | 2.05  | 2.12    | 1.63    | 0.69     | 0.38                        | 0.004473             |
| PCT     | Pontine crossing tract                              | -0 -28 -37     | 0.72  | 2.34    | -0.71   | 1.82     | 0.39                        | 0.011130             |
| GCC     | Genu of corpus callosum                             | -0 29 12       | 5.40  | 1.71    | 5.35    | 0.81     | 0.36                        | 0.007500             |
| BCC     | Body of corpus callosum                             | -0 -4 30       | 4.80  | 1.29    | 4.35    | 0.39     | 0.31                        | 0.028200             |
| SCC     | Splenium of corpus callosum                         | -0 -43 19      | 4.68  | 2.12    | 2.71    | 0.60     | 0.71                        | 0.000001             |
| FX      | Fornix (column and body of fornix)                  | -0 -6 16       | 3.30  | 0.21    | 2.68    | 0.85     | 0.38                        | 0.007370             |
| RLIC-L  | Retrolecticular Internal Capsule Post. aspect left  | -32 -28 6      | 1.23  | 1.32    | 0.18    | -0.54    | 0.63                        | 0.000015             |
| ML-L    | Medial lemniscus left                               | -8 -21 -35     | 0.27  | 0.72    | 0.86    | 0.44     | 0.23                        | 0.059700             |
| ML-R    | Medial lemniscus right                              | 7 -21 -35      | 1.13  | 1.54    | 1.55    | 1.50     | 0.55                        | 0.000103             |
| ICP-L   | Inferior cerebellar peduncle left                   | -6 -35 -40     | 0.97  | 1.17    | 2.30    | -0.07    | 0.32                        | 0.014960             |
| ICP-R   | Inferior cerebellar peduncle right                  | 5 -34 -40      | 0.55  | 0.43    | 1.76    | -0.57    | 0.48                        | 0.000630             |
| SCP-L   | Superior cerebellar peduncle left                   | -10 -43 -43    | 1.41  | 2.00    | 1.27    | 0.98     | 0.52                        | 0.000313             |
| SCP-R   | Superior cerebellar peduncle right                  | 9 -43 -44      | 0.99  | 1.00    | 1.36    | 0.69     | 0.53                        | 0.000267             |
| CP-L    | Cerebral peduncle left                              | -7 -38 -30     | 2.15  | 1.61    | 3.84    | 0.16     | 0.61                        | 0.000016             |
| CP-R    | Cerebral peduncle right                             | 6 -38 -30      | 2.26  | 0.35    | 3.39    | 1.48     | 0.70                        | 0.000002             |
| CST-L   | Corticospinal tract left                            | -14 -16 -14    | 1.53  | 1.16    | 1.38    | -0.38    | 0.26                        | 0.040700             |
| CST-R   | Corticospinal tract right                           | 13 -16 -15     | 0.85  | 0.21    | 0.38    | -0.86    | 0.39                        | 0.006110             |
| ALIC-L  | Anterior limb of internal capsule left              | -18 10 9       | 3.92  | 1.87    | 2.97    | 1.39     | 0.38                        | 0.004700             |
| ALIC-R  | Anterior limb of internal capsule right             | 17 10 9        | 4.79  | 2.09    | 3.56    | 0.86     | 0.76                        | 0.000000             |
| PLIC-L  | Posterior limb of internal capsule left             | -22 -10 8      | -2.10 | -0.41   | -1.55   | -1.78    | 0.73                        | 0.000000             |
| PLIC-R  | Posterior limb of internal capsule right            | 20 -10 8       | -1.40 | -0.75   | -0.96   | -1.65    | 0.52                        | 0.000294             |
| RLIC-R  | Retrolecticular Internal Capsule Post. aspect right | 31 -29 5       | 1.81  | 1.04    | 0.64    | -0.67    | 0.87                        | 0.000000             |
| ACR-L   | Anterior corona radiata left                        | -23 30 12      | 5.33  | 3.02    | 4.14    | 1.13     | 0.13                        | 0.173200             |
| ACR-R   | Anterior corona radiata right                       | 21 30 13       | 5.51  | 2.93    | 3.42    | 0.90     | 0.32                        | 0.017000             |
| SCR-L   | Superior corona radiata left                        | -25 -8 34      | 2.07  | 2.13    | 1.93    | -0.13    | 0.59                        | 0.000075             |
| SCR-R   | Superior corona radiata right                       | 24 -7 34       | 2.24  | 2.09    | 1.82    | 0.24     | 0.69                        | 0.000012             |
| PCR-L   | Posterior corona radiata left                       | -25 -39 30     | 3.04  | 2.14    | 2.78    | 0.00     | 0.51                        | 0.000318             |
| PCR-R   | Posterior corona radiata right                      | 24 -37 31      | 4.08  | 2.30    | 4.03    | 0.95     | 0.33                        | 0.018600             |
| PTR-L   | Posterior thalamic radiation left                   | -34 -56 7      | 3.90  | 1.71    | 3.57    | 0.83     | 0.22                        | 0.072020             |
| PTR-R   | Posterior thalamic radiation right                  | 33 -55 7       | 3.26  | 1.14    | 2.92    | 0.19     | 0.46                        | 0.001382             |
| SS-L    | Sagittal stratum left                               | -40 -28 -12    | 3.27  | 1.77    | 2.52    | 0.31     | 0.50                        | 0.000267             |
| SS-R    | Sagittal stratum right                              | 40 -28 -12     | 3.96  | 2.53    | 3.16    | 1.11     | 0.53                        | 0.000167             |
| EC-L    | External capsule left                               | -31 1 8        | 1.14  | 1.26    | 1.35    | -1.30    | 0.67                        | 0.000004             |
| EC-R    | External capsule right                              | 30 1 8         | 2.01  | 1.48    | 1.89    | -0.19    | 0.72                        | 0.000000             |
| CGC-L   | Cingulum (cingulate gyrus) left                     | -9 -11 34      | 3.54  | 2.91    | 2.69    | 2.09     | 0.22                        | 0.063800             |
| CGC-R   | Cingulum (cingulate gyrus) right                    | 8 -10 34       | 3.23  | 1.83    | 2.74    | 2.23     | 0.17                        | 0.123700             |
| CGH-L   | Cingulum (hippocampus) left                         | -23 -29 -18    | 1.69  | 2.98    | 1.77    | 1.43     | 0.76                        | 0.000001             |
| CGH-R   | Cingulum (hippocampus) right                        | 21 -31 -17     | 2.02  | 2.01    | 1.94    | 1.87     | 0.72                        | 0.000003             |
| FX/ST-L | Fornix (cres) / Striaterminalis left                | -29 -24 -6     | 2.43  | 1.25    | 2.24    | 1.22     | 0.50                        | 0.000303             |
| FX/ST-R | Fornix (cres) / Striaterminalis right               | 28 -25 -5      | 2.72  | 1.44    | 2.94    | 0.96     | 0.49                        | 0.000518             |
| SLF-L   | Superior longitudinal fasciculus left               | -37 -25 28     | 3.49  | 1.74    | 3.12    | 0.09     | 0.27                        | 0.034800             |
| SLF-R   | Superior longitudinal fasciculus right              | 37 -25 27      | 3.95  | 2.03    | 3.52    | 0.47     | 0.53                        | 0.000138             |
| SFO-L   | Superior fronto-occipital fasciculus left           | -23 7 24       | 2.89  | 2.40    | 3.56    | 0.84     | 0.22                        | 0.059560             |
| SFO-R   | Superior fronto-occipital fasciculus right          | 21 5 24        | 2.23  | 2.04    | 1.93    | 0.82     | 0.52                        | 0.000427             |
| IFO-L   | Inferior fronto-occipital fasciculus left           | -31 6 -8       | 2.26  | 1.02    | 1.85    | -0.16    | 0.58                        | 0.000027             |
| IFO-R   | Inferior fronto-occipital fasciculus right          | 30 7 -8        | 2.05  | 0.82    | 2.58    | 0.76     | 0.44                        | 0.002090             |
| UNC-L   | Uncinate fasciculus left                            | -34 4 -16      | 0.72  | 0.42    | 1.43    | -0.14    | 0.55                        | 0.000080             |
| UNC-R   | Uncinate fasciculus right                           | 35 1 -17       | 0.59  | 0.44    | 2.41    | 0.44     | 0.69                        | 0.000008             |
| TAP-L   | Tapatum left                                        | -31 -38 16     | 3.98  | 1.59    | 3.74    | 0.53     | 0.13                        | 0.215600             |
| TAP-R   | Tapatum right                                       | 27 -51 19      | 2.87  | 2.21    | 3.35    | -0.36    | 0.63                        | 0.000138             |
| SCRar   | Superior Corona Radiata Anterior                    | 13 6 58        | 2.30  | 0.42    | 1.74    | -0.70    | 0.19                        | 0.106890             |

|       |                                                    |             |      |       |      |       |      |          |
|-------|----------------------------------------------------|-------------|------|-------|------|-------|------|----------|
|       | aspect right                                       |             |      |       |      |       |      |          |
| SCRal | Superior Corona Radiata Anterior aspect left       | -15 8 57    | 2.58 | 1.32  | 1.89 | -0.98 | 0.28 | 0.024720 |
| SCRpr | Superior Corona Radiata Posterior aspect right     | 16 -20 61   | 1.69 | -0.82 | 1.72 | -1.27 | 0.25 | 0.070600 |
| SCRpl | Superior Corona Radiata Posterior aspect left      | -20 -20 61  | 1.86 | 0.46  | 2.13 | -0.82 | 0.40 | 0.006440 |
| PCRsr | Posterior Corona Radiata Superior aspect right     | 17 -40 57   | 4.83 | 1.63  | 4.22 | 0.93  | 0.46 | 0.001100 |
| PCRsl | Posterior Corona Radiata Superior aspect left      | -17 -40 56  | 4.29 | 1.94  | 3.71 | 0.81  | 0.57 | 0.000196 |
| ACRsr | Anterior Corona Radiata Superior aspect right      | 15 41 34    | 4.76 | 3.12  | 3.58 | 2.32  | 0.15 | 0.148600 |
| ACRsl | Anterior Corona Radiata Superior aspect left       | -16 42 34   | 4.19 | 2.83  | 2.88 | 1.58  | 0.26 | 0.049880 |
| ACRil | Anterior Corona Radiata Inferior aspect left       | 14 52 -4    | 3.60 | 1.65  | 2.82 | 0.47  | 0.26 | 0.048700 |
| ACRil | Anterior Corona Radiata Inferior Aspect right      | -15 52 -4   | 4.42 | 2.14  | 3.11 | 1.16  | 0.37 | 0.010900 |
| RLICr | Retrolecticular Interior Capsule Ant. aspect right | 15 -14 -6   | 2.70 | 1.69  | 2.32 | 0.99  | 0.66 | 0.000007 |
| RLICl | Retrolecticular Interior Capsule Ant. aspect left  | -11 -9 -2   | 2.43 | 0.98  | 1.22 | 1.31  | 0.67 | 0.000006 |
| LMCr  | Lateral Middle Cerebellum (dentate nuclei) right   | 28 -65 -43  | 2.69 | 3.18  | 1.63 | 0.72  | 0.68 | 0.000008 |
| LMCl  | Lateral Middle Cerebellum (dentate nuclei) left    | -31 -66 -43 | 3.28 | 3.95  | 2.93 | 2.08  | 0.35 | 0.015500 |
| ACRr  | Anterior Corona Radiata right MFG WM               | 36 19 28    | 5.28 | 2.10  | 3.80 | 1.59  | 0.40 | 0.010500 |
| ACRl  | Anterior Corona Radiata left MFG WM                | -34 21 28   | 5.37 | 2.57  | 4.02 | 1.21  | 0.54 | 0.000678 |
| SLFr  | Superior Longitudinal Fasciculus right             | 47 -2 27    | 4.26 | 2.04  | 2.85 | 0.64  | 0.20 | 0.105500 |
| SLFl  | Superior Longitudinal Fasciculus left              | -46 -3 28   | 5.11 | 2.30  | 3.39 | 1.71  | 0.10 | 0.262700 |
| SLFpr | Superior Longitudinal Fasciculus Post. asp. right  | 41 -53 35   | 5.20 | 2.37  | 3.60 | 1.03  | 0.35 | 0.014500 |
| SLFpl | Superior Longitudinal Fasciculus Post. asp. left   | -42 -47 37  | 4.72 | 2.16  | 3.41 | 1.21  | 0.28 | 0.045000 |
| PCRr  | Superior Occipital Gyrus WM right skeleton         | 18 -70 28   | 4.66 | 1.96  | 3.57 | 0.89  | 0.57 | 0.000132 |
| PCRl  | Superior Occipital Gyrus WM left skeleton          | -19 -69 30  | 4.66 | 2.35  | 3.68 | 1.55  | 0.20 | 0.084900 |
| PTRr  | Posterior Thalamic Radiation right skeleton        | 25 -81 -3   | 4.12 | 1.04  | 3.05 | 0.33  | 0.49 | 0.001000 |
| PTRl  | Posterior Thalamic Radiation left skeleton         | -24 -80 -1  | 3.79 | 1.35  | 3.49 | 1.22  | 0.17 | 0.133600 |
| STGr  | Superior Temporal Gyrus WM right skeleton          | 41 4 -28    | 3.00 | 2.30  | 2.14 | 1.92  | 0.75 | 0.000000 |
| STGl  | Superior Temporal Gyrus WM left skeleton           | -44 4 -24   | 3.63 | 1.88  | 2.51 | 2.62  | 0.56 | 0.000137 |
| Brain | Whole Brain                                        | -1 -20 10   | 4.82 | 2.69  | 3.69 | 1.40  | 0.45 | 0.001200 |

Table 1S

List of all anatomically defined regions with t-test values from GLM contrast comparing healthy comparison subjects and each probands and relative groups. Last two columns show  $h^2$  value and significance of heritability estimate. Heritability was estimated using SOLAR with scanner used as a covariate. The heritability inversely correlate with clinical contrast (regions with high heritability tends to show lower difference between probands and healthy controls). This trend is present even when only healthy controls are used in the heritability estimate so it is not an artifact of sample that contains many probands and their related healthy relatives.

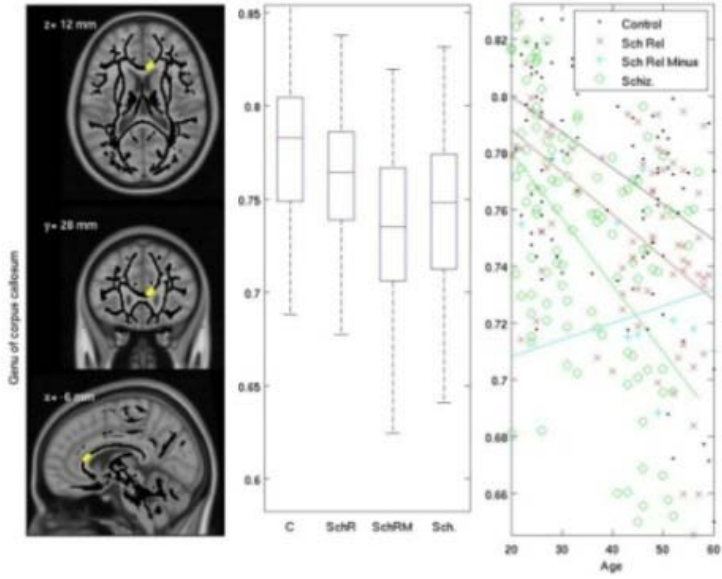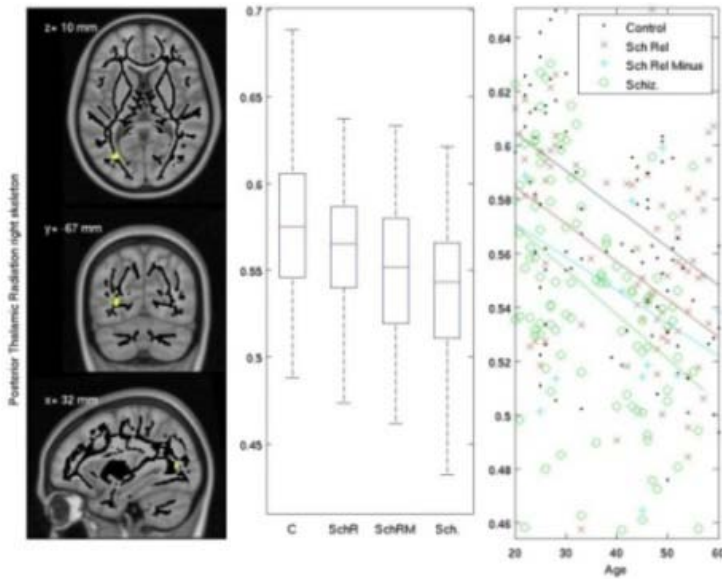

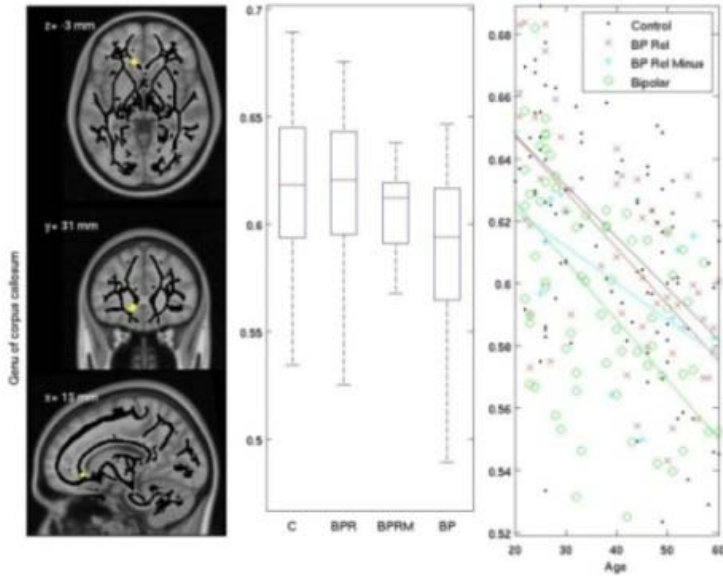

Figure 1S

Regions showing differences between subgroups of relatives (cluster A subjects more similar to patients than other relatives). Two top panels show genu of Corpus Callosum and right posterior thalamic radiation are centered around voxel showing high difference between schizophrenia subjects and control. Lower region is defined within genu of Corpus Callosum but is centered around voxel maximizing the difference between PBP probands and healthy controls. Schizophrenia data show progressive lowering of FA values between groups while Bipolar show unaffected relatives similar to controls and cluster A relatives more similar patients.

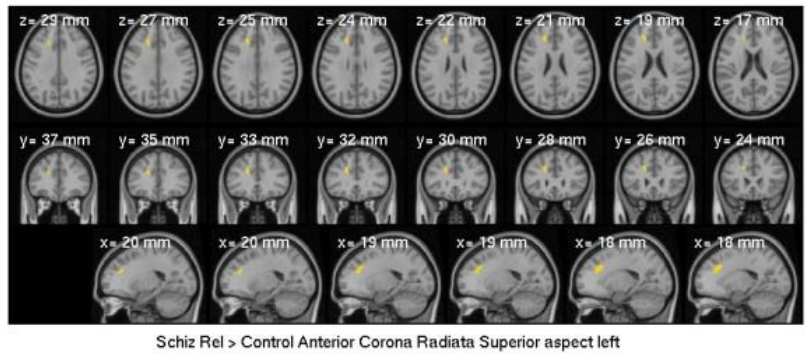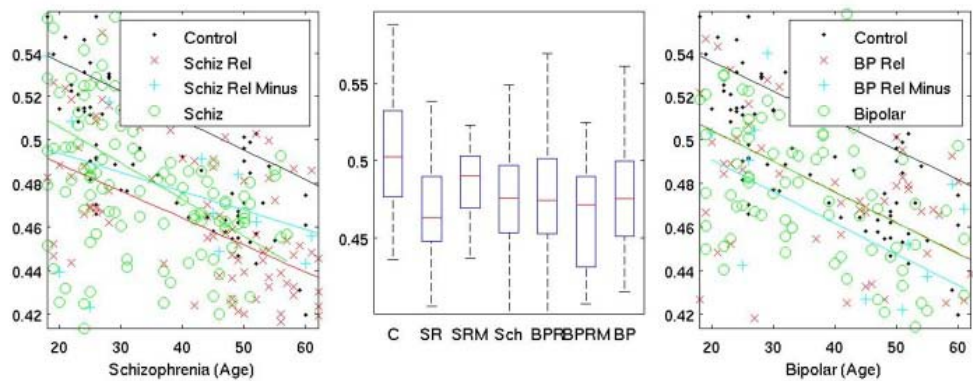

Figure 2S

Cluster within superior aspect of left anterior corona radiata detected in analysis contrasting healthy schizophrenia relatives with healthy controls at  $p < 0.05$ , whole brain volume corrected using Threshold Free Cluster Enhancement (TFCE). FA shows similar age decrease in both clinical groups. Similar slightly weaker differences between clinical groups were found in its right hemisphere homologue.

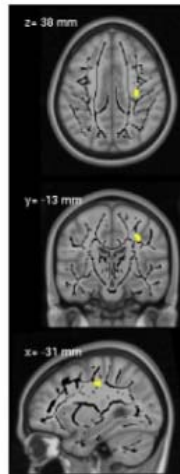

Figure 3S

Cluster in the left Superior Longitudinal Fasciculus at MNI coordinate (-33,-19,41) showing high correlation between Schizophrenia-Bipolar Scale (SBS) and FA. PBP probands show higher FA values (are more similar to healthy controls) than SZ probands.
